# Supplementary material for: An exploration into the amide–pseudo amide hydrogen bonding synthon between a new coformer with two primary amide groups and theophylline
Source: Royal Society of Chemistry journal article supplement (doi:10.1039/c7ce01666b), 2017-01-01
Supplement: c7ce01666b1.pdf [file c7ce01666b1.pdf]

# **An exploration into the amide-pseudo amide hydrogen bonding synthon between a new coformer with two primary amide groups and theophylline†**

**Datta Markad<sup>a</sup> and Sanjay K. Mandal<sup>a\*</sup>**

*<sup>a</sup>Department of Chemical Sciences, Indian Institute of Science Education and Research, Mohali, Sector 81, Manauli PO, S.A.S. Nagar, Mohali (Punjab) 140306, INDIA*

## **Electronic Supplementary Information**

## NMR Spectroscopy

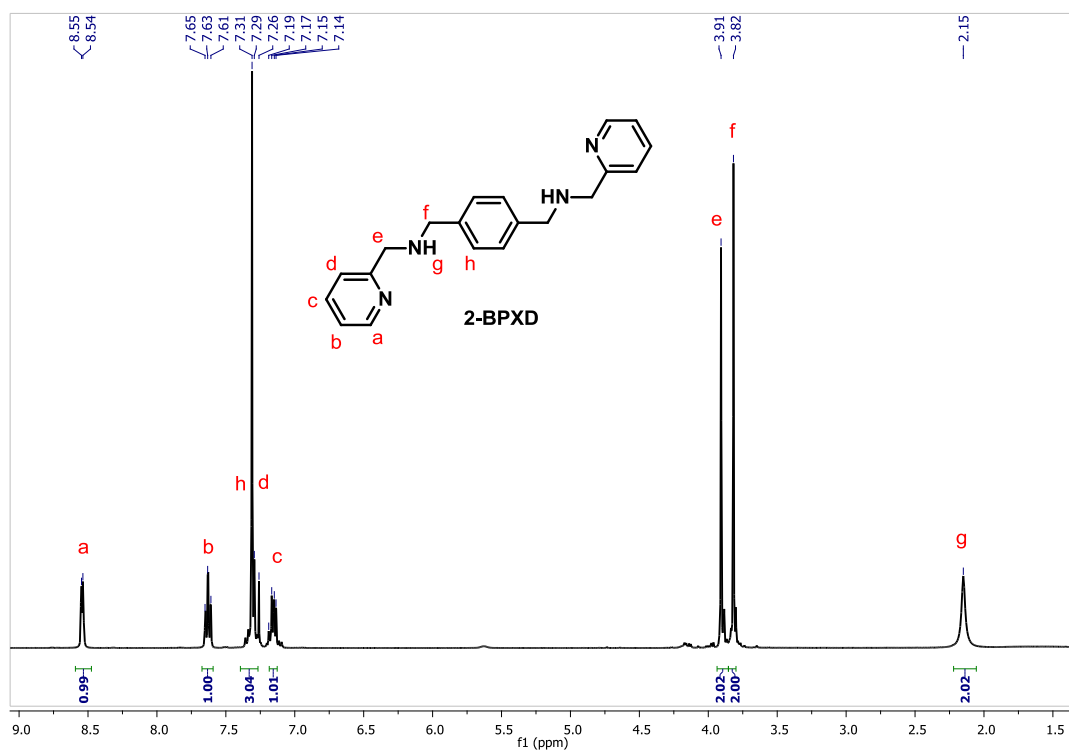

Fig. S1  $^1\text{H}$  NMR of step-1 (2-BPXD) in  $\text{CDCl}_3$ .

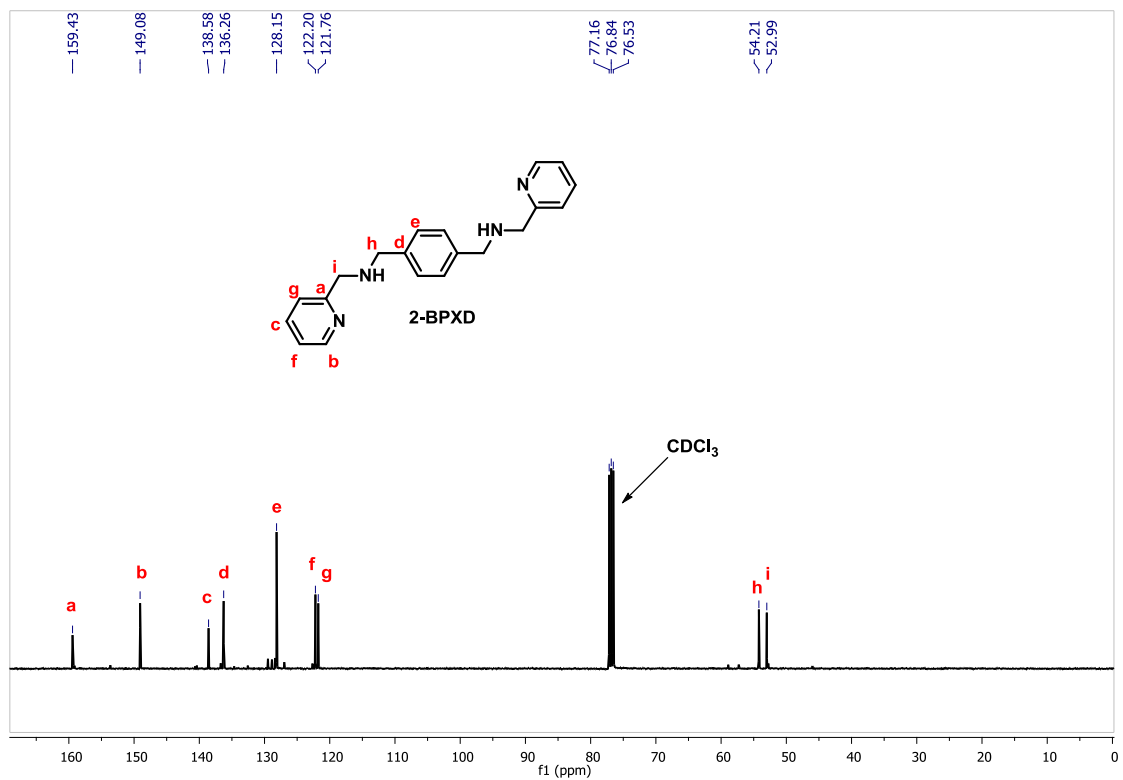

Fig. S2  $^{13}\text{C}$  NMR of step-1 (2-BPXD) in  $\text{CDCl}_3$ .

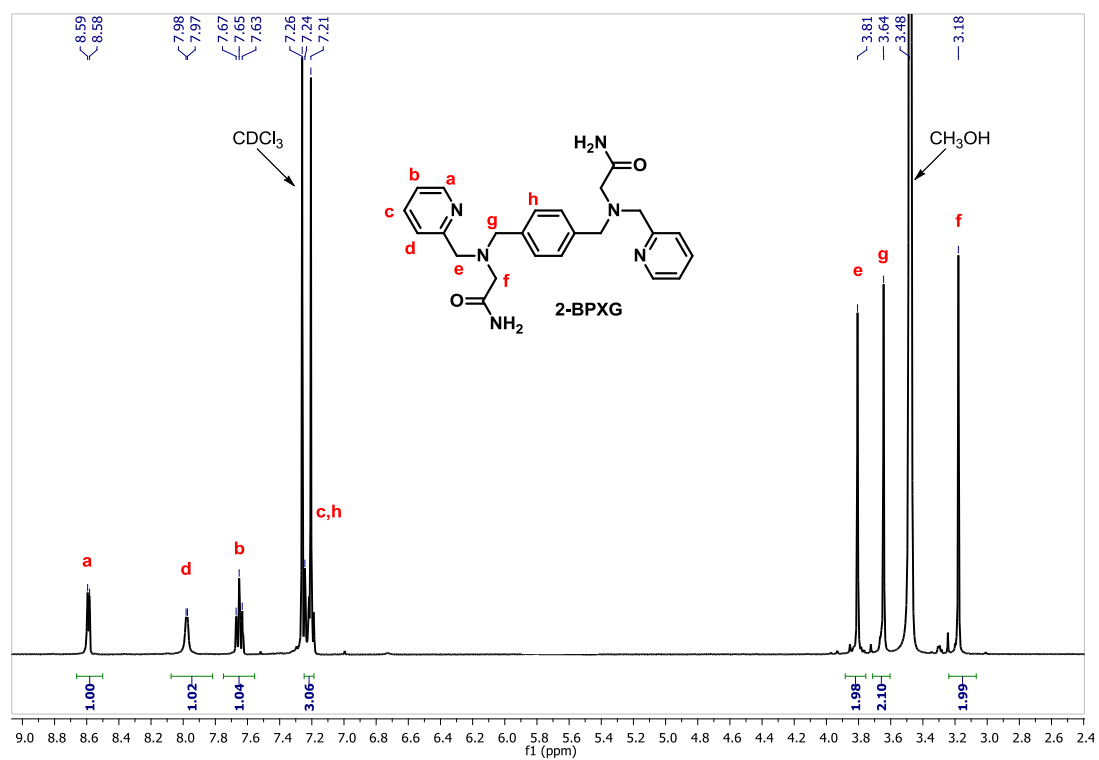

Fig. S3 <sup>1</sup>H NMR of step-2 (2-BPXG) in CDCl<sub>3</sub>.

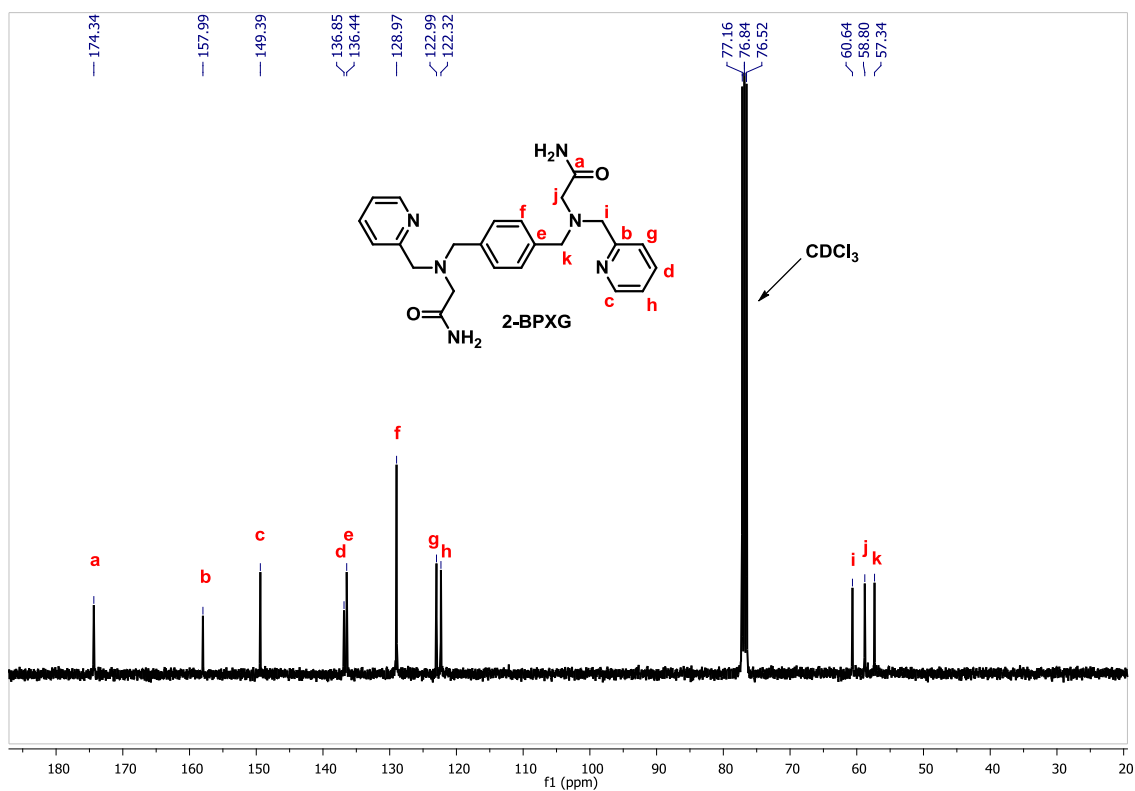

Fig. S4 <sup>13</sup>C NMR of step-2 (2-BPXG) in CDCl<sub>3</sub>.

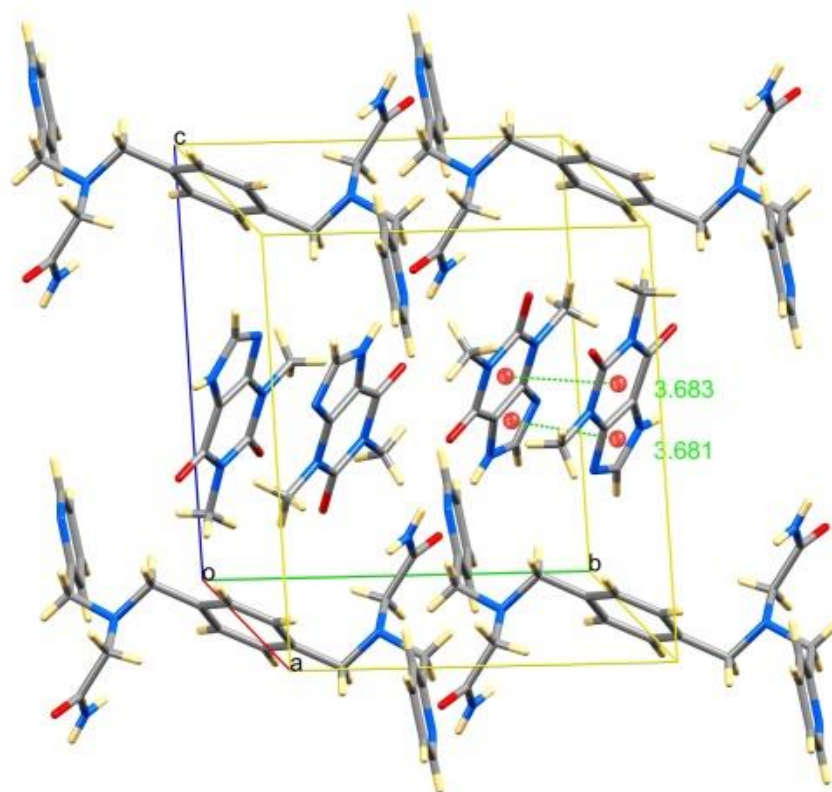

**Fig. S5** Unit cell of **2-BPXG-4THP**, where strong  $\pi$ - $\pi$  interactions between the **THP** molecules are indicated.

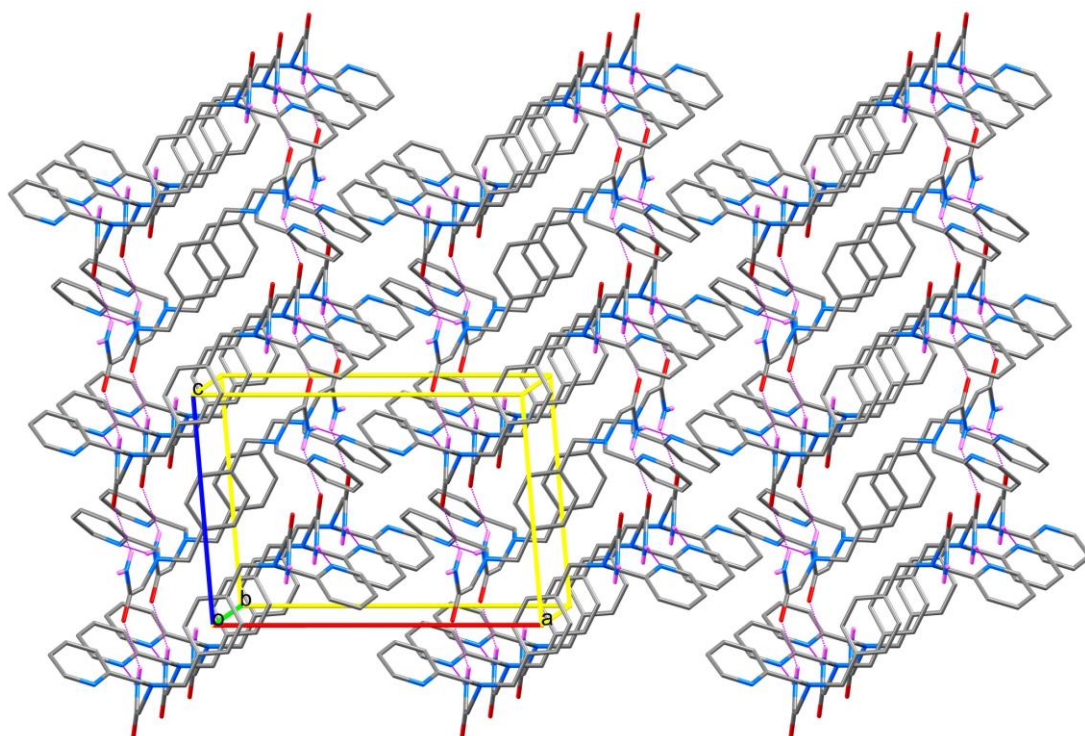

**Fig. S6** Stacking of the 2D supramolecular network with its unit cell highlighted for **2-BPXG**.

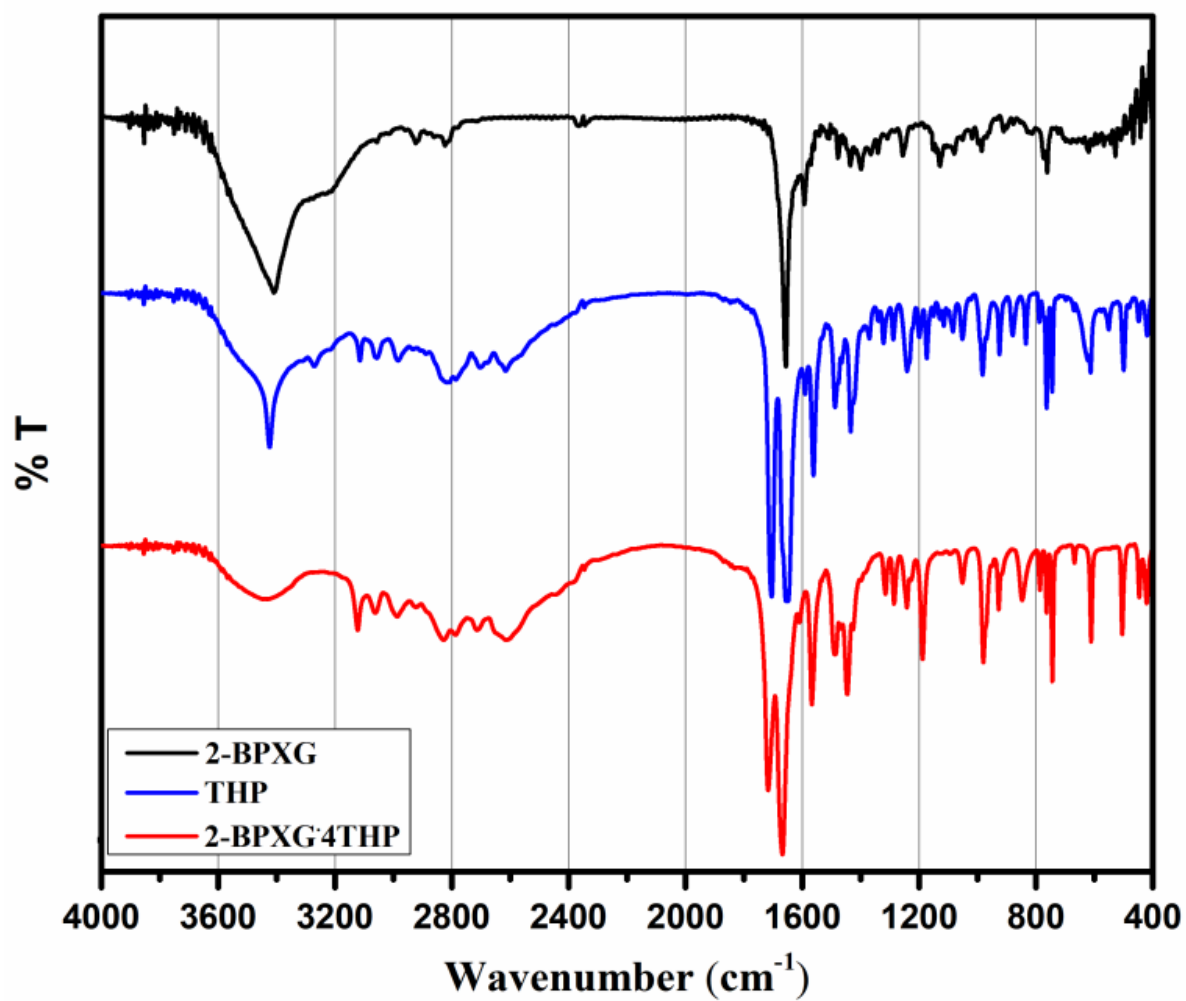

**Fig. S6** FT-IR spectra of **2-BPXG**, **2-BPXG·4THP** and **THP** in the full region of 400–4000 cm<sup>-1</sup>.

## Differential Scanning Calorimetry (DSC)

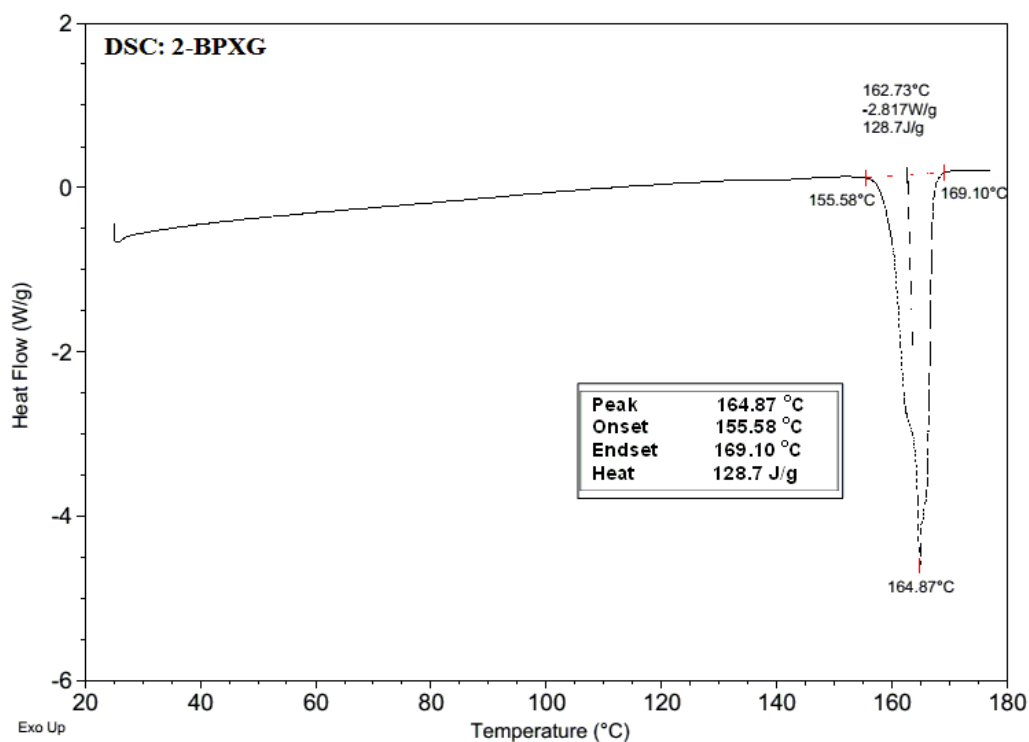

Fig. S8 DSC curve of a 2-BPXG recorded at a 10 °C min<sup>-1</sup> heating rate.

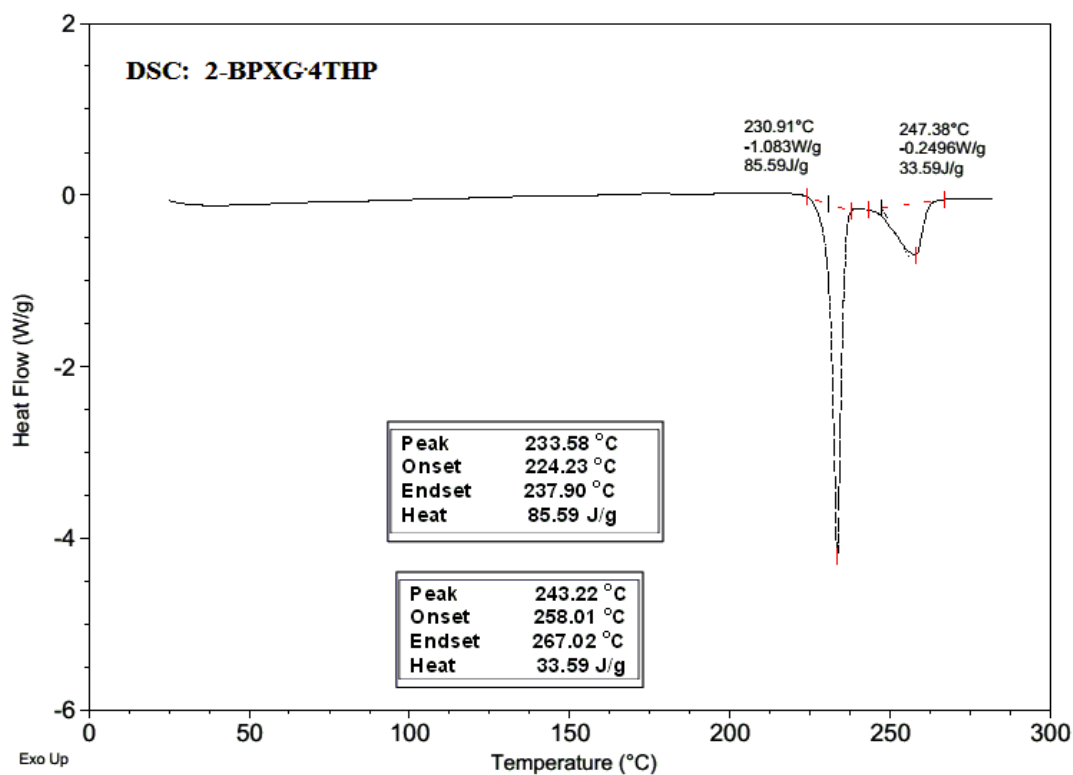

Fig. S9 DSC curve of a 2-BPXG·4THP recorded at a 10 °C min<sup>-1</sup> heating rate.
